# Supplementary material
Source: Springer Nature journal article supplement (https://www.springermedizin.de/resource/supplementary/12879_2012_2736_MOESM2_ESM.pdf/9445292)

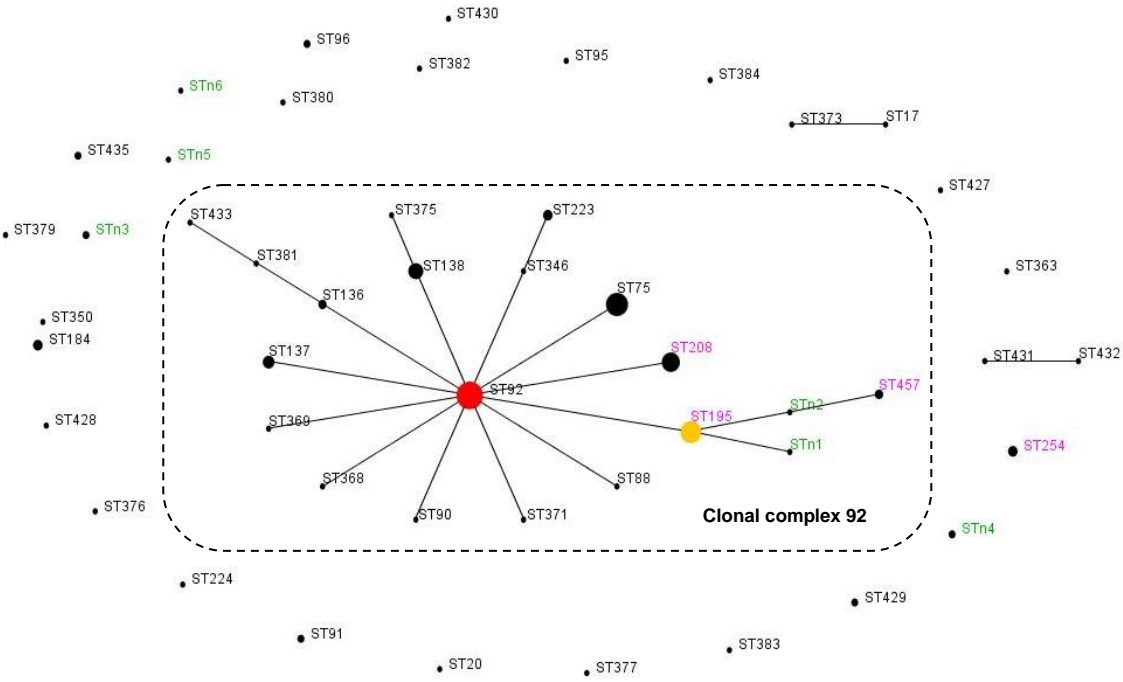

Supplement: MOESM2 [file 9445292]
